# Supplementary material for: Evaluation of 71 Coronary Artery Disease Risk Variants in a Multiethnic Cohort
Source: Front Cardiovasc Med. 2018 Mar 14;5:19. doi: 10.3389/fcvm.2018.00019 (PMC5931137; doi:10.3389/fcvm.2018.00019)
Supplement: Table S4 — Results of regional replication by index or leading SNPs. [file Table4.xlsx]

## Sheet: Supp T4
Supplementary Table 4. Results of Regional Replication by Index or Leading SNPs
						African Americans			Latinos			Japanese Americans			Overall
Regions	CHR	Index SNP	Tested Allele	Reference Allele	Regional Alpha Value	Lead SNP in the Region	Lead SNP P	r2 with index SNP under EUR	Lead SNP in the Region	Lead SNP P	r2 with index SNP under EUR	Lead SNP in the Region	Lead SNP P	r2 with index SNP under EUR	Lead SNP in the Region	Lead SNP P	r2 with index SNP under EUR
PPAP2B	1	rs17114036	G	A	0.0022	rs72664341	0.0001757	0.950949	rs6588634	0.128	0.808195	rs11206824	0.1063	0.764712	rs72664341	0.0007988	0.950949
SORT1	1	rs602633	T	G	0.0062	rs3832016	5.89e-05	0.962658	rs611917	0.01922	0.511423	rs4970836	0.2089	0.819398	rs3832016	2.505e-05	0.962658
TTC32-WDR35	2	rs2123536	A	G	0.0036	rs6733260	0.08744	0.649856	rs72775156	0.03572	0.47189	rs6708954	0.02625	0.533081	rs6733260	0.003254	0.649856
APOB	2	rs515135	T	C	0.0012	rs201027918	0.002695	0.963387	rs200202030	0.001298	0.783974	chr2:21401884	0.03541	0.467682	rs577584	0.0002566	0.86021
EDNRA	4	rs1878406	T	C	0.0024	rs11731096	0.005598	0.420392	rs17612742	0.02762	0.861073	rs72955609	0.01399	0.591401	rs6841581	0.0007084	0.960165
SLC22A4-SLC22A5	5	rs273909	G	A	0.0062	rs17689550	0.005541	0.904539	rs10071051	0.415	0.406835	rs2667735	0.009498	0.541671	rs2667735	0.2549	0.541671
PHACTR1	6	rs9369640	C	A	0.0012	rs6458545	0.0253	0.892143	rs9395214	0.01325	0.967853	rs7750679	0.01491	0.972831	rs9395214	0.0003781	0.967853
SLC22A3-LPAL2-LPA	6	rs3798220	C	T	0.0125	rs4709431	0.007703	1	rs71033586	0.2714	0.602178	rs9457906	0.05132	0.872648	rs71033586	0.1917	0.602178
9p21	9	rs1333049	C	G	0.0017	rs10217586	0.02341	0.802203	rs141014318	0.06805	0.862952	rs10811656	0.001499	0.952423	rs10217586	0.001042	0.802203
SH2B3	12	rs3184504	T	C	0.0125	rs10774625	0.004695	0.93128	rs1265565	0.07258	0.466583	rs10774624	0.5241	0.859273	rs653178	0.1788	0.978138
MFGE8-ABHD2	15	rs8042271	A	G	0.0038	rs2351256	0.3614	0.527798	rs8037001	0.001706	0.629892	rs2083460	0.09162	0.574118	rs2351254	0.00211	0.610944
FURIN-FES	15	rs17514846	A	C	0.0017	rs11539637	0.01153	0.912306	rs8182016	0.0001081	0.481819	rs12906125	0.046	0.445116	rs2071384	0.009247	0.523391
RAI1-PEMT-RASD1	17	rs12936587	A	G	0.0007	rs9899364	0.0004478	0.514999	rs11078388	0.04544	0.496195	rs4925093	0.06641	0.497973	rs11078388	0.0623	0.496195
BCAS3	17	rs7212798	C	T	0.0007	rs9895671	0.007593	0.692427	rs113639679	0.001702	0.880871	rs35158689	0.003752	0.826407	17:58916915	0.0006321	0.869269
APOE-APOC1	19	rs445925	A	G	0.0125	rs7412	0.1072	0.664599	rs7412	0.004293	0.664599	rs7412	0.1359	0.664599	rs7412	0.001258	0.664599
