# Supplementary material for: Evaluation of 71 Coronary Artery Disease Risk Variants in a Multiethnic Cohort
Source: Front Cardiovasc Med. 2018 Mar 14;5:19. doi: 10.3389/fcvm.2018.00019 (PMC5931137; doi:10.3389/fcvm.2018.00019)
Supplement: Table S7 — Sensitivity analysis: associations with CHD SNPs using controls with claims. [file Table7.xlsx]

## Sheet: Supp T7
Supplementary Table 7. Sensitivity Analysis: Associations with CHD SNPs Using Controls with Claims (The red color highlights statisical significant results (p<0.05)).
								African Americans						Latinos						Japanese Americans						Overall
								All African Americans		Medicare		Medicare+CHDD		All Latinos		Medicare		Medicare+CHDD		All Japanese Americans		Medicare		Medicare+CHDD		All		Medicare		Medicare+CHDD
								ca = 2,376	co = 4,139	ca = 1,573	co = 1,322	ca = 2,349	co = 3,220	ca = 2,291	co = 3,818	ca = 1,526	co = 1,321	ca = 2,276	co = 2,984	ca = 1,368	co = 3,294	ca = 1,210	co = 1,841	ca = 1,332	co = 2,103	ca = 6,035	co = 11,251	ca = 4,309	co = 4,484	ca = 5,957	co = 8,307
Nearest Genes	CHR	Published SNP	Position, BP	Discovery Population	Tested Allele	Reference Allele	Reported OR	OR	p	OR	p	OR	p	OR	p	OR	p	OR	p	OR	p	OR	p	OR	p	OR	p	OR	p	OR	p
PCSK9	1	rs11206510	55496039	EUR	t	c	1.04	1.07	0.23	1.003	0.977	1.058	0.326	1.06	0.355	1.055	0.567	1.092	0.174	0.956	0.68	1.054	0.677	1.014	0.909	1.05	0.207	1.032	0.582	1.066	0.115
PPAP2B	1	rs17114036	56962821	EUR	a	g	1.09	1.14	0.0193	1.246	0.00575	1.129	0.0295	1.11	0.194	1.254	0.0674	1.143	0.12	1.09	0.639	1.064	0.757	1.056	0.769	1.13	0.00701	1.228	0.0012	1.129	0.00774
SORT1	1	rs602633	109821511	EUR	c	a	1.13	1.13	0.00411	1.11	0.116	1.147	0.00237	1.11	0.0418	1.175	0.0262	1.135	0.0156	1.01	0.876	0.9183	0.442	1.01	0.921	1.11	0.000786	1.099	0.0335	1.127	0.000202
IL6R	1	rs4845625	154422067	EUR	t	c	1.06	1.12	0.00963	1.089	0.186	1.112	0.0181	0.991	0.822	0.9494	0.401	0.9985	0.972	1.1	0.0655	1.103	0.0925	1.114	0.0477	1.06	0.0199	1.046	0.205	1.067	0.0164
MIA3	1	rs17465637	222823529	EUR	c	a	1.08	0.985	0.735	0.933	0.306	1.005	0.918	0.994	0.884	0.9659	0.599	1.011	0.807	1.04	0.532	1.023	0.757	1.049	0.483	0.999	0.982	0.9708	0.455	1.016	0.598
TTC32-WDR35	2	rs16986953	19942473	EUR	a	g	1.09	0.967	0.568	0.9465	0.503	0.9916	0.883	1.11	0.0602	1.117	0.195	1.107	0.0911	1.1	0.0606	1.064	0.312	1.097	0.104	1.06	0.0571	1.044	0.317	1.063	0.0698
TTC32-WDR35	2	rs2123536	19945577	Chinese	t	c	1.25	1.03	0.646	0.9528	0.564	1.002	0.972	1.03	0.545	0.9555	0.556	1.01	0.862	1.1	0.0962	1.113	0.13	1.105	0.128	1.05	0.124	1.014	0.758	1.032	0.36
APOB	2	rs515135	21286057	EUR	g	a	1.07	1.05	0.252	1.075	0.234	1.042	0.329	1.11	0.0385	1.098	0.232	1.121	0.0391	0.987	0.861	1.091	0.341	1.025	0.771	1.06	0.0525	1.085	0.0542	1.064	0.046
ABCG5-ABCG8	2	rs6544713	44073881	EUR	t	c	1.06	0.962	0.461	0.9668	0.671	0.9837	0.766	0.925	0.132	0.8212	0.00948	0.9303	0.187	NA	NA	NA	NA	NA	NA	0.943	0.112	0.8887	0.0322	0.9571	0.259
VAMP5-VAMP8-GGCX	2	rs1561198	85809989	EUR	a	g	1.06	1.05	0.259	1.061	0.345	1.039	0.382	1.04	0.379	1.023	0.71	1.062	0.182	0.992	0.876	1.017	0.776	1.003	0.951	1.03	0.252	1.033	0.358	1.039	0.164
ZEB2-ACO74093.1	2	rs2252641	145801461	EUR	g	a	1.06	0.999	0.985	1.007	0.923	1.027	0.598	1.04	0.314	1.045	0.461	1.031	0.464	0.946	0.359	0.9761	0.736	0.956	0.501	1.01	0.787	1.014	0.728	1.015	0.607
WDR12	2	rs6725887	203745885	EUR	c	t	1.1	0.91	0.368	0.905	0.521	0.8905	0.267	0.993	0.92	1.018	0.868	0.9945	0.941	2.42	0.0506	2.004	0.0355	1.531	0.16	0.981	0.74	1.028	0.747	0.9756	0.677
MRAS	3	rs9818870	138122122	EUR	t	c	1.05	1.05	0.478	1.156	0.139	1.072	0.304	1.06	0.4	1.131	0.265	1.12	0.147	0.86	0.0844	0.7914	0.0225	0.8711	0.149	0.995	0.912	1.011	0.855	1.039	0.397
REST-NOA1	4	rs17087335	57838583	EUR	t	g	1.06	1.12	0.0184	1.043	0.559	1.102	0.0564	1.04	0.395	1.053	0.477	1.013	0.8	1.04	0.398	1.057	0.355	1.038	0.506	1.07	0.0192	1.052	0.195	1.051	0.0999
EDNRA	4	rs1878406	148393664	EUR	t	c	1.1	1.08	0.165	1.069	0.357	1.073	0.171	1.11	0.0656	1.143	0.109	1.089	0.154	1.08	0.136	1.057	0.371	1.075	0.206	1.09	0.00669	1.081	0.0577	1.078	0.0194
GUCY1A3	4	rs1842896	156511459	Chinese	t	g	1.13	0.981	0.708	1.068	0.395	0.9829	0.744	1.05	0.18	1.068	0.27	1.062	0.159	1.05	0.45	1.09	0.261	1.07	0.344	1.03	0.287	1.074	0.0759	1.037	0.227
GUCY1A3	4	rs7692387	156635309	EUR	g	a	1.08	1.04	0.571	1.036	0.716	0.9983	0.981	1.05	0.358	0.9422	0.432	1.053	0.336	1.01	0.909	0.9813	0.785	1.026	0.687	1.03	0.346	0.9785	0.631	1.03	0.398
IRX1- ADAMTS16	5	rs11748327	4029789	Japanese	c	t	1.25	1.09	0.294	1.004	0.972	1.096	0.276	1.002	0.968	1.075	0.336	1.02	0.707	0.978	0.741	0.9631	0.63	0.9864	0.852	1.01	0.752	1.017	0.731	1.026	0.503
SLC22A4-SLC22A5	5	rs273909	131667353	EUR	c	t	1.07	0.846	0.22	0.8286	0.35	0.8616	0.294	1.001	0.996	0.937	0.529	0.9873	0.862	1.15	0.414	1.464	0.105	1.331	0.198	0.986	0.803	0.9722	0.742	0.9844	0.803
ADTRP-C6orf105	6	rs6903956	11774583	Chinese	a	g	1.51	1.01	0.792	0.9869	0.863	0.9948	0.921	0.995	0.912	0.9525	0.442	0.9734	0.549	1.01	0.89	1.073	0.569	1.095	0.43	1.01	0.775	0.98	0.657	0.9911	0.786
PHACTR1	6	rs9369640	12901441	EUR	a	c	1.09	1.04	0.389	1.065	0.295	1.046	0.285	1.08	0.0778	1.05	0.421	1.082	0.0714	1.11	0.178	1.208	0.0446	1.186	0.0507	1.06	0.0275	1.082	0.0427	1.076	0.0107
BTN2A1	6	rs6929846	26458265	Japanese	t	c	1.51	1.12	0.0189	1.181	0.0286	1.14	0.0115	1.03	0.573	0.9871	0.847	1.007	0.887	1.19	0.152	1.279	0.0909	1.245	0.107	1.08	0.0211	1.089	0.0728	1.076	0.0309
HCG27, HLA-C	6	rs3869109	31184196	EUR	g	a	1.15	0.995	0.905	0.9443	0.353	1.003	0.94	1.03	0.423	1.057	0.366	1.053	0.232	1.03	0.514	0.9734	0.645	1.011	0.834	1.02	0.454	0.99	0.774	1.023	0.38
C6orf10-BTNL2	6	rs9268402	32341353	Chinese	g	a	1.17	0.988	0.817	0.9739	0.737	0.9981	0.972	1.01	0.888	1.132	0.0374	1.085	0.0536	1.08	0.167	1.108	0.127	1.114	0.0846	1.02	0.516	1.084	0.0387	1.064	0.0337
HCG27, HLA-C	6	rs11752643	32669373	EUR	t	c	1.31	NA	NA	NA	NA	NA	NA	1.08	0.657	1.372	0.192	1.369	0.0745	0.948	0.652	1.008	0.958	1.013	0.923	0.989	0.91	1.174	0.173	1.178	0.0874
ANKS1A	6	rs12205331	34898455	EUR	c	t	1.01	1.05	0.621	0.9232	0.552	1.01	0.914	0.943	0.266	0.8967	0.168	0.9436	0.301	0.951	0.785	0.8179	0.386	0.8386	0.407	0.967	0.454	0.8958	0.094	0.9554	0.326
KCNK5	6	rs10947789	39174922	EUR	t	c	1.07	0.965	0.659	0.9124	0.427	0.9501	0.537	1.04	0.38	0.9966	0.961	1.044	0.38	1.01	0.906	1.01	0.885	0.9768	0.714	1.02	0.607	0.9889	0.803	1.006	0.866
TCF21	6	rs12190287	134214525	EUR	c	g	1.04	0.931	0.258	0.8411	0.0657	0.9181	0.189	1.07	0.0836	1.107	0.101	1.076	0.0986	1.03	0.56	0.9998	0.997	1.002	0.972	1.03	0.311	1.011	0.787	1.017	0.583
SLC22A3-LPAL2-LPA	6	rs2048327	160863532	EUR	g	a	1.05	1.17	0.0143	1.146	0.175	1.158	0.0302	1.03	0.524	1.056	0.362	1.032	0.452	1.01	0.819	0.9953	0.935	1.005	0.931	1.05	0.105	1.041	0.295	1.047	0.125
SLC22A3-LPAL2-LPA	6	rs3798220	160961137	EUR	c	t	1.28	1.86	0.0102	0.9106	0.76	1.626	0.0155	1.04	0.412	1.018	0.807	0.9954	0.93	0.976	0.778	0.9695	0.759	0.9442	0.546	1.04	0.312	0.9975	0.967	1.008	0.857
PLG	6	rs4252120	161143608	EUR	t	c	1.07	0.997	0.951	0.9343	0.371	1.008	0.876	0.959	0.442	0.9493	0.52	0.9886	0.841	NA	NA	NA	NA	NA	NA	0.979	0.569	0.9381	0.247	0.9977	0.953
HDAC9	7	rs2023938	19036775	EUR	g	a	1.08	1.09	0.0935	1.076	0.325	1.051	0.34	1.07	0.373	1.107	0.368	1.074	0.377	NA	NA	NA	NA	NA	NA	1.08	0.0588	1.095	0.146	1.063	0.164
PFTK1	7	rs1859023	90240585	AFR	g	a	1.75	0.981	0.709	0.9148	0.266	0.9766	0.663	1.02	0.693	0.944	0.399	0.992	0.868	0.977	0.707	1.003	0.971	1.017	0.813	0.996	0.892	0.9538	0.27	0.9916	0.794
7q22	7	rs10953541	107244545	EUR	c	t	1.05	1.07	0.519	0.9475	0.751	1.005	0.967	1.03	0.592	0.9746	0.745	1.033	0.57	0.956	0.641	1.022	0.85	0.9744	0.808	1.02	0.638	0.9838	0.79	1.017	0.711
ZC3HC1	7	rs11556924	129663496	EUR	c	t	1.08	0.984	0.821	0.9167	0.408	0.9776	0.752	0.895	0.0314	0.859	0.0483	0.9076	0.0736	0.86	0.301	0.9643	0.839	0.9963	0.982	0.92	0.037	0.8878	0.0419	0.9365	0.117
NOS3	7	rs3918226	150690176	EUR	t	c	1.14	1.02	0.896	1.07	0.715	1.042	0.755	1.25	0.0142	1.363	0.0213	1.241	0.0229	NA	NA	NA	NA	NA	NA	1.18	0.0315	1.246	0.042	1.163	0.0478
LPL	8	rs264	19813180	EUR	g	a	1.11	0.989	0.848	0.9738	0.766	0.9688	0.608	1.14	0.0159	1.031	0.706	1.143	0.0209	0.884	0.0448	0.9159	0.23	0.9248	0.25	1.01	0.79	0.9678	0.482	1.019	0.6
TRIB1	8	rs2954029	126490972	EUR	a	t	1.06	1.04	0.359	1.03	0.629	1.069	0.125	0.974	0.524	1	0.996	0.9727	0.526	0.929	0.133	0.9371	0.264	0.9217	0.134	0.985	0.537	0.9864	0.694	0.9951	0.855
9p21	9	rs1333049	22125503	EUR	c	g	1.21	1.1	0.0448	1.111	0.132	1.088	0.0801	1.04	0.352	1.028	0.652	1.06	0.184	1.15	0.0094	1.154	0.0201	1.2	0.00145	1.09	0.00237	1.095	0.0138	1.102	0.000557
ABO	9	rs579459	136154168	EUR	c	t	1.04	1.03	0.665	1.116	0.203	1.031	0.603	1.07	0.204	1.085	0.299	1.097	0.0964	1.06	0.282	1.068	0.309	1.073	0.237	1.05	0.104	1.085	0.0591	1.068	0.0501
KIAA1462	10	rs2505083	30335122	EUR	c	t	1.06	0.998	0.968	1.068	0.48	1.049	0.449	0.992	0.84	1.062	0.325	1.009	0.837	1.06	0.374	1.07	0.381	1.049	0.497	1.01	0.802	1.065	0.135	1.027	0.402
CXCL12	10	rs2047009	44539913	EUR	c	a	1.05	1.12	0.0335	1.017	0.829	1.112	0.0491	0.995	0.915	0.9625	0.557	0.9941	0.898	0.929	0.134	0.9251	0.186	0.949	0.339	1.01	0.82	0.9596	0.277	1.014	0.629
CXCL12	10	rs501120	44753867	EUR	a	g	1.06	1.07	0.0977	1.099	0.125	1.083	0.0607	1.09	0.068	1.089	0.205	1.08	0.114	1.08	0.153	1.131	0.0476	1.1	0.099	1.08	0.00453	1.107	0.00554	1.086	0.00323
LIPA	10	rs2246833	91005854	EUR	t	c	1.04	1.04	0.381	1.039	0.519	1.068	0.109	0.986	0.725	0.9619	0.52	0.983	0.689	0.864	0.0118	0.8737	0.0504	0.8564	0.0155	0.98	0.441	0.9642	0.31	0.9938	0.818
CYP17A1-CNNM2-NT5C2	10	rs12413409	104719096	EUR	g	a	1.08	1.02	0.806	1.007	0.956	0.9782	0.794	1.07	0.21	1.04	0.618	1.072	0.213	1.03	0.552	0.9756	0.712	0.9787	0.728	1.05	0.194	1.003	0.953	1.019	0.612
SWAP70	11	rs10840293	9751196	EUR	a	g	1.06	1.03	0.537	1.061	0.439	1.034	0.524	0.984	0.688	0.9207	0.171	0.9841	0.709	1.04	0.484	1.021	0.772	0.9895	0.875	1.01	0.696	0.9866	0.733	1.001	0.975
PDGFD	11	rs974819	103660567	EUR	a	g	1.08	1.03	0.464	1.076	0.217	1.06	0.16	1.05	0.297	1.057	0.447	1.06	0.256	1.03	0.575	1.011	0.853	0.9992	0.989	1.04	0.18	1.047	0.209	1.044	0.119
ZNF259-APOA5-APOA1	11	rs964184	116648917	EUR	g	c	1.05	1.04	0.487	1.025	0.799	1.032	0.628	1.1	0.0425	1.143	0.0502	1.089	0.074	0.975	0.681	0.9834	0.824	0.9914	0.902	1.05	0.119	1.058	0.205	1.051	0.146
ATP2B1	12	rs7136259	90081188	Chinese	t	c	1.21	1.0002	0.997	0.9446	0.327	1.005	0.899	1.03	0.464	1.07	0.324	1.014	0.773	1.05	0.327	1.059	0.357	1.068	0.246	1.02	0.363	1.016	0.653	1.022	0.421
SH2B3	12	rs3184504	111884608	EUR	t	c	1.07	1.18	0.0147	1.169	0.226	1.163	0.0785	0.976	0.603	1.077	0.281	0.9679	0.503	NA	NA	NA	NA	NA	NA	1.04	0.341	1.098	0.125	1.013	0.763
BRAP	12	rs3782886	112110489	Japanese	c	t	1.44	NA	NA	NA	NA	NA	NA	0.424	0.0271	0.206	0.00153	0.4257	0.0157	1.05	0.431	1.05	0.485	1.006	0.93	1.03	0.651	1.017	0.804	0.9782	0.726
KSR2	12	rs11830157	118265441	EUR	g	t	1.12	1.11	0.0956	1.138	0.184	1.134	0.0539	1.001	0.979	1.029	0.641	1.006	0.896	0.981	0.78	1.032	0.695	0.983	0.823	1.02	0.478	1.051	0.253	1.032	0.335
FLT1	13	rs9319428	28973621	EUR	a	g	1.06	0.999	0.982	1.05	0.444	1.018	0.693	1.02	0.696	1.097	0.217	1.015	0.778	0.996	0.942	0.9828	0.779	0.9958	0.942	1.01	0.812	1.036	0.361	1.011	0.706
COL4A1/A2	13	rs4773144	110960712	EUR	g	a	1.06	1.04	0.295	1.103	0.109	1.04	0.353	0.956	0.283	0.8985	0.0889	0.9423	0.181	1.09	0.1	1.12	0.0697	1.08	0.184	1.02	0.424	1.037	0.31	1.011	0.685
COL4A1/A2	13	rs9515203	111049623	EUR	t	c	1.08	1.05	0.246	0.9719	0.661	1.035	0.444	1.05	0.3	1.044	0.524	1.04	0.408	1.03	0.688	1.005	0.955	0.9725	0.733	1.05	0.113	1.006	0.89	1.028	0.36
HHIPL1	14	rs2895811	100133942	EUR	c	t	1.04	1.08	0.0895	1.133	0.0669	1.119	0.0184	0.975	0.561	0.9383	0.324	0.9834	0.715	0.931	0.215	0.9535	0.488	0.9428	0.358	1.002	0.952	1.002	0.954	1.024	0.424
SMAD3	15	rs56062135	67455630	EUR	c	t	1.07	0.939	0.462	0.8253	0.162	0.9231	0.378	1.005	0.938	1.029	0.747	1.02	0.742	0.917	0.496	0.8386	0.25	0.9386	0.659	0.975	0.572	0.9404	0.353	0.983	0.721
ADAMTS7	15	rs7173743	79141784	EUR	t	c	1.06	0.963	0.339	1.052	0.387	0.9568	0.275	1.07	0.0794	1.022	0.714	1.055	0.205	1.04	0.454	1.043	0.484	1.044	0.439	1.02	0.398	1.039	0.264	1.011	0.66
MFGE8-ABHD2	15	rs8042271	89574218	EUR	g	a	1.1	1.01	0.818	1.038	0.653	0.9983	0.976	1.13	0.00771	1.091	0.182	1.119	0.0161	0.987	0.833	0.9632	0.616	0.9998	0.998	1.06	0.0669	1.035	0.419	1.053	0.103
FURIN-FES	15	rs17514846	91416550	EUR	a	c	1.07	1.03	0.555	1.059	0.44	1.033	0.524	1.09	0.044	1.086	0.206	1.092	0.0603	0.971	0.675	1.008	0.921	0.9644	0.641	1.05	0.124	1.057	0.19	1.047	0.141
SMG6	17	rs216172	2126504	EUR	c	g	1.07	1.001	0.992	1.076	0.343	1.016	0.768	0.981	0.659	1.023	0.717	1.038	0.407	0.878	0.0623	1.031	0.714	1.076	0.349	0.968	0.269	1.041	0.344	1.036	0.258
RAI1-PEMT-RASD1	17	rs12936587	17543722	EUR	g	a	1.04	1.02	0.636	0.9922	0.904	1.017	0.701	0.946	0.186	0.962	0.533	0.9482	0.229	0.924	0.295	1.006	0.947	0.972	0.735	0.973	0.331	0.9823	0.654	0.9805	0.503
UBE2Z	17	rs15563	47005193	EUR	c	t	1.01	0.98	0.711	0.9048	0.227	0.9543	0.405	1	1	0.9574	0.46	0.9907	0.824	1.06	0.318	1.006	0.927	0.9761	0.695	1.01	0.757	0.9618	0.317	0.9772	0.434
BCAS3	17	rs7212798	59013488	EUR	c	t	1.08	0.987	0.806	0.979	0.797	0.9898	0.854	1.15	0.0107	1.2	0.0303	1.162	0.0118	1.07	0.404	1.186	0.104	1.142	0.173	1.07	0.0731	1.106	0.0501	1.078	0.0457
PMAIP1-MC4R	18	rs663129	57838401	EUR	a	g	1.06	0.945	0.31	1.037	0.661	0.9359	0.251	1.09	0.136	1.098	0.294	1.089	0.179	0.929	0.226	0.8932	0.172	0.8642	0.0584	0.985	0.655	1.001	0.979	0.9682	0.387
LDLR	19	rs1122608	11163601	EUR	g	t	1.06	0.956	0.578	1.006	0.954	0.945	0.452	1.08	0.202	1.097	0.278	1.062	0.316	1.01	0.885	1.049	0.579	0.9905	0.907	1.03	0.493	1.056	0.299	1.009	0.832
ZNF507-LOC400684	19	rs12976411	32882020	EUR	a	t	1.33	1.02	0.818	0.9139	0.566	1.031	0.774	0.97	0.72	1.082	0.541	0.9704	0.741	1.03	0.591	0.9356	0.327	0.958	0.498	1.01	0.746	0.959	0.455	0.9751	0.588
APOE-APOC1	19	rs2075650	45395619	EUR	g	a	1.11	1.06	0.338	0.9796	0.81	1.031	0.626	1.1	0.148	1.054	0.601	1.098	0.189	0.97	0.64	0.998	0.979	0.9791	0.774	1.04	0.261	1.005	0.916	1.035	0.377
APOE-APOC1	19	rs445925	45415640	EUR	c	t	1.13	1.03	0.522	1.039	0.564	1.034	0.476	1.18	0.0546	1.231	0.103	1.124	0.201	1.12	0.293	1.077	0.549	1.123	0.315	1.07	0.0819	1.077	0.162	1.06	0.138
KCNE2 (gene desert)	21	rs9982601	35599128	EUR	t	c	1.1	1.11	0.0288	1.044	0.55	1.087	0.0983	0.901	0.189	0.7788	0.0371	0.911	0.264	NA	NA	NA	NA	NA	NA	1.05	0.247	0.9724	0.648	1.04	0.362
POM121L9P-ADORA2A	22	rs180803	24658858	EUR	g	t	1.2	0.966	0.724	0.9129	0.553	1.014	0.893	NA	NA	NA	NA	NA	NA	1.18	0.102	1.172	0.192	1.22	0.0827	1.07	0.379	1.087	0.371	1.121	0.123
